# Supplementary material for: Genome-wide analysis of the WOX gene family and the role of EjWUSa in regulating flowering in loquat (Eriobotrya japonica)
Source: Front Plant Sci. 2022 Nov 3;13:1024515. doi: 10.3389/fpls.2022.1024515 (PMC9669421; doi:10.3389/fpls.2022.1024515)
Supplement: Supplementary file 1 [file DataSheet_1.xlsx]

## Sheet: Table S1
Table S1 The EjWOX protein sequences
>EjWUSa(Eja05G013550.1)
MDPQQNPNELQDGGNRQGGGIMCRQSSTRWTPTTDQIKILKDLYYNNGIRSPSAEQIQRI SAKLRQFGKIEGKNVFYWFQNHKARERQKKRFTSSSAPDHHHHAAPPVPAVPLEANNIRQ RSSGVGIDINATAAAAYEQPPINHHSKYSNISAPPAGFSSASSSSVGVNVSVGAQMGNYG YGSMAMEKSFRECSISSGGSTSTGHVGGSNYNTFNHNYGSWVGVDPYSSPYTIFDKKSPSKPVFGDQENMTEEEYYNLQASQEIETLPLFPMHGEDIHGFGNIKSSSMDGYYSGWYGSDGGNDGGSRTSLELSLNSYGHMTHDYFRSY
>EjWUSb(Eja03G017360.1)
MDPQQNPNELLDGGNRQGGGVMCRQSSTRWTPTTDQIKILKDLYYNNGIRSPSAEQIHRI SAKLRQYGKIEGKNVFYWFQNHKARERQKKRFTSSSAPDHHAAPPMPAVPPQADNIRQRSSGFGIDINATAAAAYEQLPINHHSKYSNISSSPAGFSSASSSSVGVNVSAGAQMGNYGYG SMAMEKSFRDCSLSSGGSTSTGHVGGSNYHNFNHNPGSWVGVDPYSSPYTIFDKKSPSKQVFGDQENMTEEDYYNQPPEIETLPLFPMHGEDIHGFGNIKSSSMEGYYSGWYRSDGGNDGGSRTSLELSLNSYGHMTPDCFRSC
>EjWOX1a(Eja06G001390.1)
MWMMGYNDGGHGDFNMPDSFNGRKLHPIVPSPLPSVNNTVSSTITTPPCLNRSAIHGSHDFFPQYHQLAAMAEQNKRSEFLNTPQVVVSSRWNPTPEQLRALEELYRRGTRTPSAEQIQHITAQLRKYGKIEGKNVFYWFQNHKARERQKRRRQMESSALSADHDQPLQISMTSADNQKKEESLGASRTGYEVEETKNWAPSINCSTTTLTEESVSIQRASKARMAAAECRADGWIQFDEEELQQRRNFVEKNATWQMMQLSCPSHPHPPTHLINTPPTCASTTTRSRAAATGRTMDQRLIKSHDLSIFIAPYASETGFNIEQDHGCEESQTLQLFPLRSGHGNASANTNELSISDKDHA ELSASFSAHPYPFFEFLPLKN
>EjWOX1b(Eja14G019830.1)
MWMMGYNDGGHGDFNMPDSFNGRKLRPLIPRPLPSVNNTSSTITTPPCLNRSAIHGSHDFLTQYHQLAAMAEQNKRSEFLNRPQVVVSSRWNPTPEQLRALEELYRRGTRTPSAEQIQHI TAQLRKYGKIEGKNVFYWFQNHKARERQKRRRQMESSALSAEHDQQLQISMTSTDNQKKEELLGASRTGFEVAETKNWAPSTNCSTDILVEESVSIQRAAKAAAAECRTDGWIQFDEEEL QQRRNFVERNATWQMMQLSCPSHPPTHLINTPPTCASTTARSGAAATVRRTDQRLFKSHDLSIFIAPYTSETGFNTEQDHGGEESQTLQLFPLRSGHVNASANANELSVNNKDHTELSAS FSAHPYPFFEFLPLKN
>EjWOX2(Eja09G010840.1)
MEGDHHHNAVLLDQRHVQAGSGRAGDSGSTSRWNPTKEQVDMLENFYKQGVRTPSAEQIQQITSRLKAFGHIEGKNVFYWFQNHKARQRQKQKQESMAYNRLLHRRTTQPIFLPPHDLNPPCPNVMCSPYYVPFHSELGFYPQSPYPNMVPLPVVPSVVKRRPRAEKLEKRRTTCTTGGAGYEPMHPHNGYNSSGGSDMINDATSKLISKCDQQTLPLFPLQPTGILQQGREDQNYPSTVNYADSSSAALSGSSADQTVEDRQPFYDFFAG
>EjWOX3a(Eja04G017350.1)
MSPAANSSSSSRWCPAPEQLMLLEEMYRAGIRTPNASQIQQITAQLSFYGKIEGKNVFYW FQNHKARDRQKLRRKLCNQLQQQQLLYHHHNYHDYRNCHYEQQLNQQTFLGYLESPPPVPSALHHKQLSTCRHHNNYSSTGFHPPQVGVEDALIYTWKMEIPEKVEMEKSVMSMYGREWMMMMMDVSPPSSCCTSSSSSTTTTLTTSTPPLKTLQLFPITATDLKEEFTPFHSALSSSTLTENH
>EjWOX3b(Eja09G011670.1)
MSPAANSSSSRWCPTPEQLMLLEEMYRAGIRTPNASQIQHITAQLSFYGKIEGKNVFYWF QNHKARDRQKLRRKLCKQLQQQQLLYHHHNIHNYPNYHYHQQLNQQCFLGYLEFPPSASSALHYPQLSTCHHHDNYSSTGFLPPQVGVEDALINYTWKMTIPEKVEMEKSVMSMHGRDWMMNVGPPSPCCTSSRSTATTSRPPLKTLQLFPTTAANLKEESTPSYNAPSSSKPTENY
>EjWOX4a(Eja15G014170.1)
MGMSSMKVHQFARGLWEHEPSLTLGCTKRLRPLAPKLANTAAATSDTTTTLAPFDLKSFI RPESGPRKLGSSDHLQEKKDSPHPQVETHPGGTRWNPTQEQIGILEMLYRGGMRTPNAQQIEQITAQLGKYGKIEGKNVFYWFQNHKARERQKQKRSSLGLSHSPRTPTPVITTLGEIVV EREEDSPYKRKCRSWGFDCLVEGDHSSVVCKVDNDDAVKGGSVGVMTLELFPLHPEGRK
>EjWOX4b(Eja06G024530.1)
MGMSSMKVHQFARGLWEHEPSLTLGCTKRLRPLAPRLANTAAASDTTTTLAPFDLKSFIR PESGPRKLGSCNQLQEKKDSPHPQVETHPGGTRWNPTQEQIGILEMLYRGGMRTPNAQQIEQITAQLGKYGKIEGKNVFYWFQNHKARERQKQKRSSLGLSHSPRTPTPVITTLGEVVLE REEDNPYKRKCRSWEFDCLVEGDHSSSTSSVVCKLDNDDAAGGGRTLELFPLHPEGRR
>EjWOX5(Eja10G018800.1)
MDDGMSGFCIKASSFRSGGDGGNGNSGTKCGRWNPTIEQVKVLTDLFRSGLRTPSTDQIQKISSQLSFYGKIESKNVFYWFQNHKARERQKRRKVSIDDKDIIRRDQENQPSPKQINQVS EPARVIETLQLFPINSLNESEGEKLRFHANEYCKEASAFTYTVGTEMDLPPLDLRLSFH
>EjWOX7(Eja16G008720.1)
MDEGMSGFCIKASSFRGGGNGNSGTKCGRWNPTTEQVKVLTDLFRSGLRTPSTDQIQKIS SQLSFYGKIESKNVFYWFQNHKARERQKRRKVSIDDKDILSRDQENMSSPKQINQVSEPA RVIETLQLFPMNSFNESEGEKLRFHANEYCKEASAFTYTVGTEMDLPPLDLRLSFL
>EjWOX9a(Eja01G005310.1)
MASSNRHWPSMFKSKPANCTTHHQWQHDINPSLVSNGCHRPSSFSSVGGCEERSPEPKPRWNPKPEQIRILEAIFNSGMVNPPRDEIRKIRVQLQEYGQVGDANVFYWFQNRKSRSKHKLRNLHNSSRQQQTHHHHTQLPISTPVSAATTLNIINAAAPSSSSSSSSEKSSPKAPNNKAF SMGFSTHEASINSPTASVNQSTNFFQPHHPHHNEVLPESPFFFPVHQASINPNLTQGFCF SELANVVHVPHHEQTNNNNNIGPCTNILLSEIMNHGAISRKEYHHHQDDQIKTMKNVDHQ QHLNYNIDITTTPTTAAASTTPTVAVPSPVIHNSRGGVGEAGAMAPGGVAKSTVFINDVA FEVGAGPFNVREAFGDDAVLIHSSGQPVLTNEWGL…
>EjWOX9b(Eja02G005930.1)
MASTNRHWPSMFKSKPADCSTHHQWQHDISPSLVSNSCHRPSTYSPVGGCEERSPEPKPRWNPKPEQIRILEAIFNSGVVNPPRDEIRKIRAQLQEYGQVGDANVFYWFQNRKSRSKHKLRNLHNSSKQQQIHHHHTHLPISTPVSAATTLNIINAAAPSSSSSSSSEKSSPKAPNNKAF SMGFSTHDVSINSPIASVNQSTNFFQPHHPHHNEVLPESPFFFPVHQGNINPNLTQGFCL SELATVFHVPNHEQTNNNNIEPCTSLMLSEIMNHGGISRKEYHHQEDQIKATKNVDNQQH LNYNINVTTSPTTAAASTTPTVAVPSPMFHNIQGTVGEAGAMAPGGPAKLTVFINDVAFE VGAGPFNVREAFGDDAVLIHSSGQPVLTNEWGLTL…
>EjWOX11a(Eja03G028280.1)
MEDHHQHQGQDPDGSSPSNGSTERSPEPVRSRWIPKPEQILILESIFNGGMVNPPKEETV RIRKLLEKFGSVGDANVFYWFQNRRSRSRRRQRQLQASLEQRTNNNINNDPMASLSHHQLRDEIQYGISCSVPAAAPPLAFGPSPNNFLVGSSSSSSCGHHLIADHDVHHSTACVDDQFF PVSGQMGFQEIEQISGVTSALGGGPSDTSNLHFQSGLITVFINGFPTEIPKGPLDMKAAF GQDVLLVHSSGLPLPINEFGFLAHSLESGESYFLIENVFGNSNASTSSTSPSSGKAPTDE ES
>EjWOX11b(Eja17G022460.1)
MEDHHQGQDPNESSPSNGSTERSPEPVRSRWVPKPQQIIILESIFNSGMVNPPKEETVRI RKLLEKFGSVGDANVFYWFQNRRSRSRRRQRQLQASLEQRTNYNINNNQMASLSQHQVGG AIQYGASCSVPTAAPPLAFGASPNNFLVGSSSSPCGQHLIADHDVHHSIDCVGDQFFSVS GQMGFPEIEQSSRVTPVLGGGPFDTSNLHFQSGQSVATHVSTSKTNRARHVSKSRIKIET LFYKGDHSPQYFLMSFVLNHSLEFSKSELEHMYL
>EjWOX13a(Eja14G000850.1)
MGEWQQQQQQQIIHQNLQNPEEDDGIGNGNGGLFVKVMTDEQMEQLRQQIAVYTTICDQLVDLHKQLSAQQDLTGTRLGNFYCDPFMASGGHKITSRQRWTPSPVQLQILEQIFEEGNGTPCKQKIKELTMELTQHGQISETNVYNWFQNRRARSKRKQSMTAQNNAESEAEPEVESPRDEKTKPEDILSFDNSALRAENIYLQSPELGVIFVEDTMYLWLQSDYSEDVISVWKM
>EjWOX13b(Eja03G018500.1)
MMEWEKQQLKEQQEMEGNGNGSGNNGNGGVMYVKVMTDEQLETLRKQIAVYATICEQLVEMHKNLTAQQDLAGVRMGNLYCDPLMTSTGHKITARQRWTPTPVQLQILERLFEQGNGTPSKQKIKEITTELSQHGQISETNVYNWFQNRRARSKRKQQNAACNHAESEVETEVDSPKDKKTRPEETFQSQQHSAQRTEDLCFQSPEISSDLHFLDPHANTVDKMFPSHSGLRSSRHLSELSFYDEVLANSRHELMTGKMEAGNYNLFQEAEDYGMTG
>EjWOX13c(Eja05G011640.1)
MMEWEKHQPKEQQEMEGNGNGGVMYVKVMTDEQLETLRKQIAVYATICEQLVEMHKNLSAQQDLAGVRMGNLYCDQLMTSTGHKITARQRWTPTAVQLQILERLFEQGNGTPSKQKIKEITSELSQHGQISETNVYNWFQNRRARSKRKQQNAACNHAESEVETEVDSPKDKKTRPEETFQSQQNSAQRTEDLCFQSQEISSDLHFLDPHTSKADKMFPSHSGLRSSRHLSEMAFYDDVLSRHDLMTGKMEAGNYNLFQEAEDYGMTG

## Sheet: Table S2
Table S2 The MdWOX protein sequences
>MdWUSa(MD02G0113700)
MDPQQIPNEVQDGGNRQGGGIMCRQSSTRWTPTTDQIKILKDLYYNNGIRSPSAEQIQRI SAKLRQFGKIEGKNVFYWFQNHKARERQKKRFTSSSAPDHHHHAAPPVPAVPPESNNIRQ RSSGVGIDINATAAAAYEQAPINHHGKYSNISAPPAGFSSASSSSVGVNVSVGAQMGNYG YGSIAMEKSFRECSISSGGSTSTGHVGGSNYNTFNHNYGSWVGVDPYSSPYTIFDKKSSS KPVFGDQENMTEEEYYNLQASQEIETLPLFPMHGEDIHGFGNIKSSSMDGYYSGWYRSDG GNDGGSRTSLELSLNSYGHMTHDYFRSY
>MdWUSb(MD15G0215700)
MDPQQNPNELLDGGNRQGGGVMCRQSSTRWTPTTDQIKILKDLYYNNGIRSPSAEQIHRI SAKLRQYGKIEGKNVFYWFQNHKARERQKKRFTSSSTPDHHAAPPMPAVPPQADNIRQRS SGFGIDINATAAAAYEQLPINHHSKYSNISGSPAGFSSTSSSVGVNVSAGAQMGNYGYGS MAMEKSFRDCSLSSGGSTSTGHVGGSNYNNFNHNPGSWVGVDPYSSPYSIFDKKSPSKQV FGDQENMTEEEYYNQQQASPEIETLPLFPMHGEDIHGFGNIKSSSMEGYYSGWYRSDGSN DGGSRTSLELSLNSYGHMAPDCFRSC
>MdWOX1a(MD14G0205000)
MWMMGYNDGGHGDFNMPDSFNGRKLRPLVPRPLPSVNNTVSSTITTPPCLNRSAIHGSHD FFPQYHQLAAMAEQNKRSEFLNTPQVVVSSRWNPTPEQLRALEELYRRGTRTPSAEQIQH ITAQLRKYGKIEGKNVFYWFQNHKARERQKRRRQMESSALSADHDQPLQISMTSADNQKK EESLGASMTGFEVEETKNWAPFTNCSTTTLAEESVSIQRAAKARMAAADCRADGWIQFDE EELQQRRNFVERNATWQMMQLSCPSHPHPPTHLINTPPTCASTTTRSRAAATGRTMDQRL IKSHDLSICIAPHASETGFNIEQDHGCEESQTLQLFPLRSGHANASANTNELSISDKDHA ELSASFSAHPYSFFEFLPLKN
>MdWOX1b(MD06G0193300)
MWMMGYNDGGHGDFNMPDSFNGRKLRTLIPRSLPSVNNTSSTITTPPCLNRSAIYGSHDF LTQYHQLAAMAEQNKRSEFLNTPQVVVSSRWNPTPEQLRALEELYRRGTRTPSAEQIQHI TAQLRKYGKIEGKNVFYWFQNHKARERQKRRRQMESSALSAEHDQQLQISMTSTDNQKKE ELLGASRTGFEVAETKNWAPSTNCSTATYVEESVSIQRTAKAAAAECRTDGWIQFDEEEL EQRRNFVERNATWQMMQLSCPSHPHPHPPTHLINTPPTCDSTTARSRAAATVRRTDQRLF KSHDLSIFIAPYTSETGFNTEQDHGCEESQTLQLFPLRSGHVKASANANELSVNDKDHTE LSASFSAHPYPFFEFLPLKN
>MdWOX2(MD11G0089100)
MEGDHHHSAVLLDQRHVQAGSGRAGDSGSTSRWNPTKEQIDMLENFYKQGVRTPSAEQIQ QITSSLKAFGHIEGKNVFYWFQNHKARQRQKQKQESIAYNRLLHRRTTQPIFLPPYDLNL PCPNGNFIFYFIFQDSLDL
>MdWOX3a(MD03G0088400)
MNVIFKVNLKSNTVYFLFVYLFIPPPTSTLHSPQPHQKPYFSFFVYVQLPQTKSTIQEKP IMSPAANSSSSSRWCPAPKQLMLLEEMYRAGIRTPNASQIQHITAQLSFYGKIEGKNVFY WFQNHKARDRQKLRRKLCKQLQQQQLLYHHHNYHNYRNCHYEQQLNQQTFLGYLETPPPV PSALHHKQLYTCHHHNNYSSTGFLPPQVIIIYTRVYIFIS
>MdWOX3b(MD11G0095500)
MSPAANSSSSRWCPTPEQLMLLEEMYRAGIRTPNASQIQHITAQLSFYGKIEGKNVFYWF QNHKARDRQKLRRKLCKQLQQQQLLYHHHNNHNYPNYHYHQQLNQQSFLGYLESPPPASS ALHHPQLSTCHHHDNYSSTGFLPPQVGVEDALINYTWKMTIPEKVEMEKSVMSMHGRDWM MNVGPPSPCCTSTRSTATTSRPPLKTLQLFPTTAANLKEESTPSYNAPSSSSLTDNY
>MdWOX4a(MD15G0069000)
MGMSSMKVHQFARGLWEHEPSLTLGCTKRLRPLAPRLANTAAASDTTTTLAPFDLKSFIR PDSGPRKLGSSNQLQEKKDSPHPQVETHPGGTRWNPTQEQIGILEMLYREGMRTPNAQQI EKITAQLGKYGKIEGKNVFYWFQNHKARERQKQKRSSLGLSHSPRTPTPVITTLGEVVVE REEDNPYKRKCRSWEFDCLVEGDHSSSTSSVVCKLDNDDAVEGGRTLELFPLHPEGRR
>MdWOX4b(MD08G0081000)
MGMSSMKVHQFARGLWEHEPSLTLGCTKRLRPLAPKLANTAAATSDTTTTLAPFDLKSFI RPESGPRKLGSSDHLQEKKDSPHPQVETHPGGTRWNPTQEQIGILEMLYRGGMRTPNAQQ IEQITAQLGKYGKIEGKNVFYWFQNHKARERQKQKRSSLGLSHSPRTPTPVITTPGEIVV EREEDSPYKRKCRSWGFDCLVEGDHGSVVCKVDNDDAVKGGSVGVMTLELFPLHPEGRK
>MdWOX5(MD07G0177200)
MDDGMSGFCIKASSFRSGGDGGNGNSGTKCGRWNPTIEQVKVLTDLFRSGLRTPSTDQIQ KISSQLSFYGKIESKNVFYWFQNHKARERQKRRKVSIDDKDIIRRDQENKPSPKQINQVS EPVRVIETLQLFPINSLNESEGEKLRFHANEYCKEASAFTYTVGTEMDLPPLDLRLSFH
>MdWOX7(MD01G0117900)
MDEGMSGFCIKASSFRDGGNGNSGTKCGRWNPTTEQVKVLTDLFRSGLRTPSTDQIQKIS SQLSFYGKIESKNVFYWFQNHKARERQKRRKVSIDDKDIIRRDLENISSPKQINQVSEPA RVIETLQLFPINSFNESEGEKLRFHANEYCKEASAFTCTVGTEMDLPPLDLRLSFL
>MdWOX9a(MD05G0258600)
MASSNRHWPSMFKSKPANCSTHHQWQHEINPSLVSNGCHRPSSYSSVGGCEERSPEPKPR WNPKPEQIRILEAIFNSGMVNPPRDEIRKIRVQLQEYGQVGDANVFYWFQNRKSRSKHKL RNLHNSSRQQQTHHHHTQLPISTPVSAATTLNIINAAAPSSSSSSSSEKSSPKAPNNKAF SMGFSTHEASINSPTASVNQSTNFFQPHHPHHNEVLPESPFFFPVHQANINPNLTQGFCF PELANVVHVPHHEQTNNDNNNIGPCTNILLSEIMNHGAISRKEYHHHQEDQIKAMKNVDH QQHLNYNIDITTTPTTAAASSTPTVAVPFPVIHNSRGGVGEAGAMAPGGVAKSTVFINDV AFEVGAGPFNVREAFGDDAVLIHSSGQPVLTNE…
>MdWOX9b(MD10G0241600)
MASSNRHWPSMFKSKPADCSTHHQWQHDISPSLVSNSCHRPSSSSVGGCEERSPEPKPRW NPKPEQIRILEAIFNSGVVNPPRDEIRKIRAQLQEYGQVGDANVFYWFQNRKSRSKHKLR NLHNLPKQQQTHHRHTHLPISTPISAATTLNIINAAAPSSSSSSSEKSSPKAPNNKAFSM GFSTHDVSIISPIASVNQSTNFFQPHHPHHNEVLPESPFFFPVHQGNINPNLTQGFCLSE LANVVHVPNHEQTNNNNIGPCTSLLLSEIMNHGGISRKEYHHQEDQIMAMKNVDNQQHLT SPTTAVAASTNPTVAVPSPMFHNIQGSVGEAGAMAPGGPAKSTVFINDVAFEVGAGPFNV REAFGDDAVLIHSSGQPVLTNEWGLTLHSLHHG…
>MdWOX11a(MD12G0012400.1)
MEDHHQGQDPNDSSPSNGSTKRSPEPVRSRWIPKPQQILILESIFNSGMVNPPKEETVRI RKLLEKFGSVGDANVFYWFQNRRSRSRRRQRQLQASLEQRTNYNINNNQMASLSQHQVGG AIQYGVSCCVPTAAPPLAFGASPNNFLVGSSSSSCGQHLIADHDVHHSIDCVGDQFFSVS DQMGFPEIEQSSGVTSVLGGGPSDTSNLHFQSGNCTERVPNFYKFFLIKLYII
>MdWOX11b(MD14G0009900)
MEDHHQHQGQDPDGSSPSNGSTERSPEPVRSRWIPKPEQILILESIFNSGMVNPPKEETV RIRKLLEKFGSVGDANVFYWFQNRRSRSRRRQRQLQASLEQGTNNNINNDPMASLSHHQL RGEIQYGISCSVPATAPPLAFGASPNNFLMGSSSSSSCGHHLITDNDVHHSTACVDDQFF PVSGQMGFPEIEQSSGVTSALGGGPSDTSNLQFQSGLITVFINGFPTEFPKGPLDMKAVF GQDVLLVHSSGLPLPINEFGFLAQSLESGESYFLVSRPS
>MdWOX13a(MD15G0202900)
MMEWEKQQLKEQQEMEGNGNGSGNNGNGGVMYVKVMTDEQLETLRKQIAVYATICEQLVE MHKNLTSQQDLAGVRMGNLYCDPLMTSTGHKITARQRWTPTPVQLQILERLFEQGNGTPS KQKIKEITTELSQHGQISETNVYNWFQNRRARSKRKQQNAACNHAESEVETEVDSPKDKK TRPEETFQSQQHSAQRTEDLCFPSPEISSDLHFLDPHATTVDKMFPSHSGLRSSRHLSEM SFYDEVLANSRHELMTGKMEAGNYNLFQEAEDYGLTS
>MdWOX13b(MD02G0098200)
MMEWEKQQEMEGNGSGGVMYVKVMTDEQLETLRKQIAVYATICEQLVEMHKNLTAQQDLA GVRMGNLYCDQLMTSTGHKITARQRWTPTALQLQILERLFEQGNGTPSKQKIKEITSELS QHGQISETNVYNWFQNRRARSKRKQQNAACNHAESEVETEVDSPKDKKTRPEETFQSQQN SAQRTEDLCFQSQEISSDLHFLDPHTTKADKMFPSHSGLRSSRHLSEMAFYDDVLSRHDL MTGKMEAGNYNLFQEAEDYGMTG

## Sheet: Table S3
Table S3 The primers used in this experiment
Name	Prismer sequences
EjWUSaF	ATGGACCCTCAACAGAAC
EjWUSaR	TCAATATGATCTGAAGTA
EjSTMF	ATGGAAGGTGGTGGTGC
EjSTMR	TCAGAGCAATGTGGGAGAG
qEjWUSaF	CTGCTCCTGATCACCATCATCATG
qEjWUSaR	TGGTGGAGCAGAAATGTTGGAATAC
qEjWUSbF	CTCCTGATCATCACGCAGCAC
qEjWUSbR	CCCAGCTGGTGAACTAGAAATGTTG
qEjactinF	AATGGAACTGGAATGGTCAAGGC
qEjactinR	TGCCAGATCTTCTCCATGTCATC
qAtActinF	TTACCCGATGGGCAAGTC
qAtActinR	GCTCATACGGTCAGCGATAC
EjWUSa-ProF	GCATTCTACCGTCTTTG
EjWUSa-ProR	CTTTCGATTACGAGCAA
pFGC5941-EjWUSaF	ACAATTACCATGGGGCGCGCCATGGACCCTCAACAGAAC
pFGC5941-EjWUSaR	CTCTAGACTCACCTAGGATCCTCAATATGATCTGAAGTA
pCAMBIA1300-EjWUSaF	GCCATGGAGGCCAGTGAATTCATGGACCCTCAACAGAAC
pCAMBIA1300-EjWUSaR	CAGGTCGACTCTAGAGGATCCATATGATCTGAAGTAATC
pCAMBIA-CLuc-EjWUSaF	GGCGGTACCCGGGATCCAATGGACCCTCAACAGAAC
pCAMBIA-CLuc-EjWUSaR	AAAGCTCTGCAGGTCGACTCAATATGATCTGAAGTA
pCAMBIA-NLuc-EjWUSaF	GAGCTCGGTACCCGG GGATCCAATGGACCCTCAACAGAAC
pCAMBIA-NLuc-EjWUSaR	AAAGCTCTGCAGGTCGACATATGATCTGAAGTAATC
pCAMBIA-NLuc-EjSTMF	GAGCTCGGTACCCGG GGATCCAATGGAAGGTGGTGGTGC
pCAMBIA-NLuc-EjSTMR	AAAGCTCTGCAGGTCGACGAGCAATGTGGGAGAGATATCC
pXY104-EjWUSaF	TACAATTACAGGTACCCGGGGATCCATGGACCCTCAACAGAAC
pXY104-EjWUSaR	GCTGCACGCTGCCACCGCCGTCGACATATGATCTGAAGTAATC
pXY106-EjWUSaF	ACATCGAGGACGCCGGCGGATCCATGGACCCTCAACAGAAC
pXY106-EjWUSaR	GAACGAAAGCTCTGCAGGTCGACTCAATATGATCTGAAGTA
pXY106-EjSTMF	ACATCGAGGACGCCGGCGGATCCATGGAAGGTGGTGGTGC
pXY106-EjSTMR	GAACGAAAGCTCTGCAGGTCGACTCAGAGCAATGTGGGAGAG

## Sheet: Table S4
Table S4 The sequence of EjWUSa promoter
>EjWUSa promoter
GCATTCTACCGTCTTTGTAGTAGATTTATACTATTTGCTTTTTGTGTTTATAGTAGCCTTGTAGTGGTTTATCTGATGTCTTAGTACAATTTTCTCTTAAGATCAAAGAAATTGGTCAGTGAAGAATATGTACCCTCTTGTATATATTGTTTTTTTGTCAATAAAATCACTCTACCCTTGCTTGTCAAAAAACCTGTTGCTTAACGGTTTGTTAACAAATGACCCGTTATTCTAATTTGGGAAACTAGTCATGATATATATATATATATATATATATACTCTTTCACCAATAGCATAGTGATCATGTATTTGATCTTTATCTTTCATAATGGGAAAAAAAATTAGTTTCAATCAAAAGTATAACTTACAGTACATGCGTGTTACCTTAACAATAATGAA…

## Sheet: Table S5
Table S5 The EjSTM protein sequence
>EjSTM(Eja02G001680.1)
MEGGGANGTCSMMAFGENSSNGGGMCPVMMMPLMTSSHHTHHSHHHLHQHHMNINPDADT HNTSTTHQFRQLPQLPPSSNQHDHQNPHNTSGGSSFLLHNPVAAAASYFMDNNNNDGVGS SSSSSPSTVKAKIMAHPHYHRLLASYINCQKVGAPPEVVARLEEACASAASIGQMVSSSS ESGSLGQDPALDQFMEAYCEMLTKYEQEISKPFKEAMIFLQRIESQFKALTLSSSSDSAG YGDGIDRNNVSSEEEVDVNNNFIDPQAEDRELKGQLLRKYSGYLGSLKQEFMKKRKKGKL PKEARQQLLDWWSRHYKWPYPSESQKLALAESTGLDQKQINNWFINQRKRHWKPSEDMQF VVMDASHQGHYYMDTVMGNPFPMDISPTLL
